# Supplementary material
Source: publisher site journal article supplement (https://www.spandidos-publications.com/3277/downloadSupplementary)

Figure S1. Serum VD expression levels in patients with canalolithiasis and cupulolithiasis exhibit no significant difference. VD, vitamin D; NS, not significant.

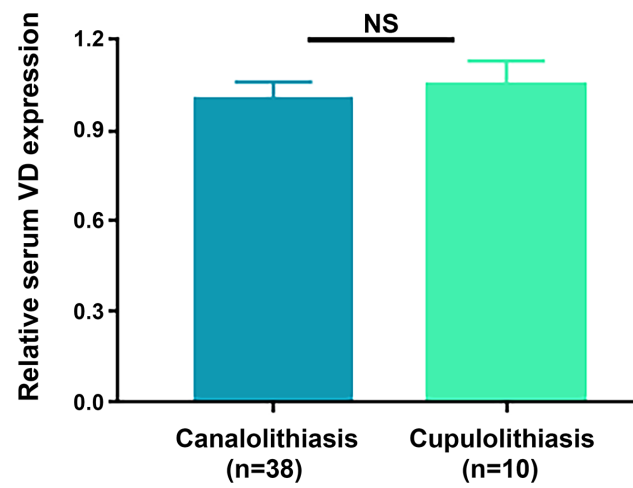

Supplement: Supplementary file 1 [file downloadSupplementary]
